# Supplementary material for: SIMAT: GC-SIM-MS data analysis tool
Source: Springer Nature journal article supplement (doi:10.1186/s12859-015-0681-2), 2015-08-17
Supplement: 12859_2015_681_MOESM1_ESM.pdf [file 12859_2015_681_MOESM1_ESM.pdf]

## Supplementary Material for SIMAT: GC-SIM-MS Analysis Tool

### 1. Parameter settings

In the following sections, we provide the optimized set of parameters used for analysis of SIM data using AMDIS and MetaboliteDetector. These parameters are loosely chosen to maximize the detection rate.

#### 1.1. AMDIS

Type of analysis: Simple/Use retention index data

Component width: 8

Adjacent peak subtraction: Two

Resolution: Medium

Sensitivity: High

Shape requirements: Medium

#### 1.2. MetaboliteDetector

Peak threshold: 3

Minimum peak height: 4

Number of bins per scan: 10

Deconvolution width (scans): 8

Similarity Score: Spec. similarity/Combined score

Max RI difference: 30

## 2. Compound names with derivatization

In Tables S1, we provide the native compound and derivative names for the compounds listed in Table 2 of the manuscript. These names are obtained from the Fiehn and NIST GC-MS libraries.

Table S1

| Index | Fiehn                        | NIST 2011                                                         |
|-------|------------------------------|-------------------------------------------------------------------|
| 1     | epsilon-caprolactam          | N/A                                                               |
| 2     | norvaline                    | N/A                                                               |
| 3     | valine                       | L-Valine, N-(trimethylsilyl)-, trimethylsilyl ester               |
| 4     | urea                         | Urea, N,N'-bis(trimethylsilyl)-                                   |
| 5     | phosphoric acid              | Phosphoric acid, tris(trimethylsilyl) ester                       |
| 6     | proline                      | L-Proline, 1-(trimethylsilyl)-, trimethylsilyl ester              |
| 7     | threonine                    | N,O,O'-Tris-(trimethylsilyl)threonine                             |
| 8     | trans-3-hydroxy-L-proline    | N/A                                                               |
| 9     | asparatic acid               | Aspartic acid, N-(trimethylsilyl)-, bis(trimethylsilyl) ester     |
| 10    | phenylalanine                | N/A                                                               |
| 11    | L-glutamic acid-2,3,3,4,4-d5 | N/A                                                               |
| 12    | glutamic acid                | Glutamic acid, N-(trimethylsilyl)-, bis(trimethylsilyl) ester, L- |
| 13    | lauric acid                  | Dodecanoic acid, trimethylsilyl ester                             |
| 14    | arabitol                     | Arabitol, pentakis(trimethylsilyl)-                               |
| 15    | sorbose                      | L-(-)-Sorbose, pentakis(trimethylsilyl) ether                     |
| 16    | linoleic acid                | Linolenic acid, trimethylsilyl ester                              |
| 17    | arachidic acid               | Eicosanoic acid, trimethylsilyl ester                             |
